# Supplementary material for: Genome-Wide Analysis of Calmodulin Binding Transcription Activator (CAMTA) Gene Family in Peach (Prunus persica L. Batsch) and Ectopic Expression of PpCAMTA1 in Arabidopsis camta2,3 Mutant Restore Plant Development
Source: MDPI journal article supplement (doi:10.3390/ijms231810500), 2022-09-10

## Supplementary Material

**Table S1.** CAMTA genes of different genome assemblies in *Prunus persica*.

| Peach varieties  | <i>Prunus persica</i> Genome | Gene ID                  | Genome references |
|------------------|------------------------------|--------------------------|-------------------|
| 'Lovell'         | Whole Genome Assembly v2.0   | Prupe.1G108700.1         | 54, 55            |
|                  |                              | Prupe.8G060300.1         |                   |
|                  |                              | Prupe.6G187700.1         |                   |
|                  |                              | Prupe.1G224000.1         |                   |
|                  |                              | Prupe.1G122800.1         |                   |
| 'Chinese Cling'  | Chinese Cling Genome V1.0    | evm.model.contig279.973  | 56                |
|                  |                              | evm.model.contig125.12   |                   |
|                  |                              | evm.model.contig7.29     |                   |
|                  |                              | evm.model.contig275.159  |                   |
|                  |                              | evm.model.contig279.1102 |                   |
| 'Zhongyoutao 14' | Zhongyoutao 14 Genome v1.0   | Pp01G011310.1            | 57                |
|                  |                              | Pp08G008580.1            |                   |
|                  |                              | Pp06G017540.1            |                   |
|                  |                              | Pp01G028410.1            |                   |
|                  |                              | Pp01G012670.1            |                   |
| '124 Pan'        | 124 Pan Genome v1.0          | P124PAN14929.1           | 58                |
|                  |                              | P124PAN03468.1           |                   |
|                  |                              | P124PAN21190.1           |                   |
|                  |                              | P124PAN16004.1           |                   |
|                  |                              | P124PAN15065.1           |                   |

References listed in the main text.

**Table S2.** Fruit CAMTA genes in *Rosaceae* family.

| Fruit name   | Organism                   | Genome source | Gene number | Gene ID                   | Length (aa) |
|--------------|----------------------------|---------------|-------------|---------------------------|-------------|
| Strawberry   | <i>Fragaria x ananassa</i> | Genome v1.0   | 16          | FxaC_13g22180.t2          | 1004        |
|              |                            |               |             | FxaC_13g26730.t1          | 914         |
|              |                            |               |             | FxaC_13g38580.t1          | 907         |
|              |                            |               |             | FxaC_14g14610.t1          | 1005        |
|              |                            |               |             | FxaC_14g18980.t1          | 928         |
|              |                            |               |             | FxaC_15g15470.t1          | 1005        |
|              |                            |               |             | FxaC_17g39580.t1          | 989         |
|              |                            |               |             | FxaC_18g15530.t1          | 989         |
|              |                            |               |             | FxaC_19g28040.t1          | 987         |
|              |                            |               |             | FxaC_1g24361.t1           | 1074        |
|              |                            |               |             | FxaC_20g31520.t1          | 987         |
|              |                            |               |             | FxaC_2g28010.t1           | 1073        |
|              |                            |               |             | FxaC_3g23640.t1           | 654         |
|              |                            |               |             | FxaC_3g23862.t1           | 879         |
|              |                            |               |             | FxaC_3g23863.t1           | 1074        |
|              |                            |               |             | FxaC_4g16590.t1           | 1191        |
| Apple        | <i>Malus domestica</i>     | Genome v1.0   | 8           | MD01G1031100              | 1107        |
|              |                            |               |             | MD05G1044600              | 1070        |
|              |                            |               |             | MD10G1051700              | 1074        |
|              |                            |               |             | MD13G1121200              | 977         |
|              |                            |               |             | MD13G1144300              | 1004        |
|              |                            |               |             | MD15G1318400              | 1108        |
|              |                            |               |             | MD16G1121200              | 977         |
|              |                            |               |             | MD16G1157900              | 910         |
|              |                            |               |             | Ppy00g1083.1              | 1125        |
|              |                            |               |             | Ppy01g0314.1              | 1111        |
| Pear         | <i>Pyrus pyrifolia</i>     | Genome v1.0   | 10          | Ppy05g0286.1              | 1075        |
|              |                            |               |             | Ppy13g0414.1              | 1176        |
|              |                            |               |             | Ppy13g1287.1              | 982         |
|              |                            |               |             | Ppy13g1472.1              | 1010        |
|              |                            |               |             | Ppy13g1558.1              | 916         |
|              |                            |               |             | Ppy15g2682.1              | 1114        |
|              |                            |               |             | Ppy16g0935.1              | 987         |
|              |                            |               |             | Ppy16g1031.1              | 881         |
| Sweet cherry | <i>Prunus avium</i>        | Genome v1.0   | 5           | Pav_sc0000028.1_g850.1.mk | 1027        |
|              |                            |               |             | Pav_sc0000091.1_g250.1.mk | 1100        |
|              |                            |               |             | Pav_sc0000334.1_g570.1.mk | 1138        |
|              |                            |               |             | Pav_sc0001031.1_g010.1.mk | 914         |
|              |                            |               |             | Pav_sc0010200.1_g030.1.mk | 993         |
| Apricot      | <i>Prunus armeniaca</i>    | Genome v1.0   | 4           | PARG04349m01              | 1268        |
|              |                            |               |             | PARG04567m01              | 898         |
|              |                            |               |             | PARG05795m01              | 994         |
|              |                            |               |             | PARG28696m01              | 1086        |

|        |                      |                |   |                 |      |
|--------|----------------------|----------------|---|-----------------|------|
| Almond | <i>Prunus dulcis</i> | Genome<br>v2.0 | 5 | Prudul26A007803 | 1131 |
|        |                      |                |   | Prudul26A015191 | 914  |
|        |                      |                |   | Prudul26A016773 | 1086 |
|        |                      |                |   | Prudul26A019053 | 1085 |
|        |                      |                |   | Prudul26A030701 | 894  |

**Table S3.** Primer sequences for 35S-*PpCAMTAs*-GFP vectors recombination.

| Primers                   | Sequence (5'→3')                                  |
|---------------------------|---------------------------------------------------|
| eGFP- <i>PpCAMTA1</i> -FP | ctgccaaattcgcgaccggtATGGCTGATACCAGAAAATACCTCC     |
| eGFP- <i>PpCAMTA1</i> -RP | tcctttgctagtcataccggtTTGACCTTCGGTGAGTGCAAG        |
| eGFP- <i>PpCAMTA2</i> -FP | ctgccaaattcgcgaccggtATGGCGGAACGCGTATCG            |
| eGFP- <i>PpCAMTA2</i> -RP | tcctttgctagtcataccggtATCAAATGCTATAGACATGAAAGTGTCC |
| eGFP- <i>PpCAMTA3</i> -FP | ctgccaaattcgcgaccggtATGTATGAGATACAAGTTGGCTCTGG    |
| eGFP- <i>PpCAMTA3</i> -RP | tcctttgctagtcataccggtTGGACCTGCTGTAGGCATGAA        |
| eGFP- <i>PpCAMTA4</i> -FP | ctgccaaattcgcgaccggtATGATGCAATCAGGGTATAATATTAATG  |
| eGFP- <i>PpCAMTA4</i> -RP | tcctttgctagtcataccggtGGGAACTGATACATATCAATGTCTTC   |
| eGFP- <i>PpCAMTA5</i> -FP | ctgccaaattcgcgaccggtATGGAAAAGCAGCTTGGGG           |
| eGFP- <i>PpCAMTA5</i> -RP | tcctttgctagtcataccggtACTATCCATGTTAGAGTCAGGATCCA   |

Lowercase letters indicate sequences on the vector.

**Table S4.** Primer sequences for RT-qPCR analysis.

| Primers                   | Sequence (5'→3')         |
|---------------------------|--------------------------|
| qPCR- <i>PpCAMTA1</i> -FP | ACCTAATTGCACGTCGTTCC     |
| qPCR- <i>PpCAMTA1</i> -RP | TTCTTCCGAACCTGATGTCC     |
| qPCR- <i>PpCAMTA2</i> -FP | AAATCCAGGCTCATGTACGG     |
| qPCR- <i>PpCAMTA2</i> -RP | CAGTCCCCTTACGTCTCCAA     |
| qPCR- <i>PpCAMTA3</i> -FP | CAGCCATTCTGGGGTGAAT      |
| qPCR- <i>PpCAMTA3</i> -RP | CAGCCTCCCATAGCGAAGAG     |
| qPCR- <i>AtICS1</i> -FP   | TATCTCCGGCAGCCGCCACT     |
| qPCR- <i>AtICS1</i> -RP   | ACGCCGGAGGAAAACGACGG     |
| qPCR- <i>AtEDS1</i> -FP   | CGAGACACATCAACTGTTGCAA   |
| qPCR- <i>AtEDS1</i> -RP   | CGCCTCTGCGCTTCCA         |
| qPCR- <i>AtSARD1</i> -FP  | TCGAGTTGGATTCGTAGCCG     |
| qPCR- <i>AtSARD1</i> -RP  | TCGCTTCAGTCATCGCTTCA     |
| qPCR- <i>AtCBP60g</i> -FP | TCGTGGACGCCACCACAAACA    |
| qPCR- <i>AtCBP60g</i> -RP | TCAGCGTTCAGCGGCACGAG     |
| qPCR- <i>AtPAD4</i> -FP   | ATCTTCTCCGCCGTCATTCC     |
| qPCR- <i>AtPAD4</i> -RP   | CACGTGGCAGAAGTTGTGTG     |
| qPCR- <i>AtPR1</i> -FP    | CACATCCGAGTCTCACTGAC     |
| qPCR- <i>AtPR1</i> -RP    | CAGACTCATACACTCTGGTG     |
| <i>AtEF1α</i> -FP         | TGAGCACGCTCTTCTTGCTTTCA  |
| <i>AtEF1α</i> -RP         | GGTGGTGGCATCCATCTTGTTACA |

**Table S5.** Primer sequences for *AtCAMTA3* pro::*PpCAMTA*-pBI121 vectors recombination.

| Primers                     | Sequence (5'→3')                          |
|-----------------------------|-------------------------------------------|
| pBI121- <i>PpCAMTA1</i> -FP | cggagaaagcaatattctagaATGGCTGATACCAGAAAATA |
| pBI121- <i>PpCAMTA1</i> -RP | ggactgaccacccggggatccTTGACCTTCGGTGAGTGCAA |
| pBI121- <i>PpCAMTA2</i> -FP | cggagaaagcaatattctagaATGGCGGAACGCGTATCGTA |
| pBI121- <i>PpCAMTA2</i> -RP | ggactgaccacccggggatccATCAAATGCTATAGACATGA |
| pBI121- <i>PpCAMTA3</i> -FP | cggagaaagcaatattctagaATGTATGAGATACAAGTTGG |
| pBI121- <i>PpCAMTA3</i> -RP | ggactgaccacccggggatccTGGACCTGCTGTAGGCATGA |
| <i>AtCAMTA3</i> promoter-FP | CTTTTCCTTTTACTATCTTATTCTCTATCT            |
| <i>AtCAMTA3</i> promoter-RP | GATATTGCTTTCTCCGATCTCAGAG                 |

Lowercase letters indicate sequences on the vector.

**Table S6.** Transcription levels for SA-related genes after 1 day infected with *Pst* DC3000. Means and standard errors were calculated from three replicates, different letters represent significant differences ( $P < 0.05$ ).

| Gene Name       | WT           | <i>camta2,3</i> | OE- <i>PpCAMTA1</i> |               |               |
|-----------------|--------------|-----------------|---------------------|---------------|---------------|
|                 |              |                 | #5                  | #6            | #13           |
| <i>AtEDS1</i>   | 0.033±0.002a | 0.042±0.003a    | 0.035±0.003a        | 0.038±0.004a  | 0.047±0.009a  |
| <i>AtPAD4</i>   | 0.038±0.005b | 0.078±0.009a    | 0.058±0.004ab       | 0.051±0.002b  | 0.060±0.003ab |
| <i>AtSARD1</i>  | 0.043±0.007b | 0.117±0.013a    | 0.071±0.006ab       | 0.070±0.017ab | 0.099±0.020ab |
| <i>AtCBP60g</i> | 0.017±0.003a | 0.036±0.006a    | 0.032±0.004a        | 0.025±0.005a  | 0.029±0.006a  |
| <i>AtICS1</i>   | 0.016±0.004a | 0.031±0.004a    | 0.021±0.002a        | 0.028±0.008a  | 0.029±0.005a  |

**Figure S1.** Conserved motifs in CAMTAs were identified using MEME suite program. Each motif is displayed with a specific color.

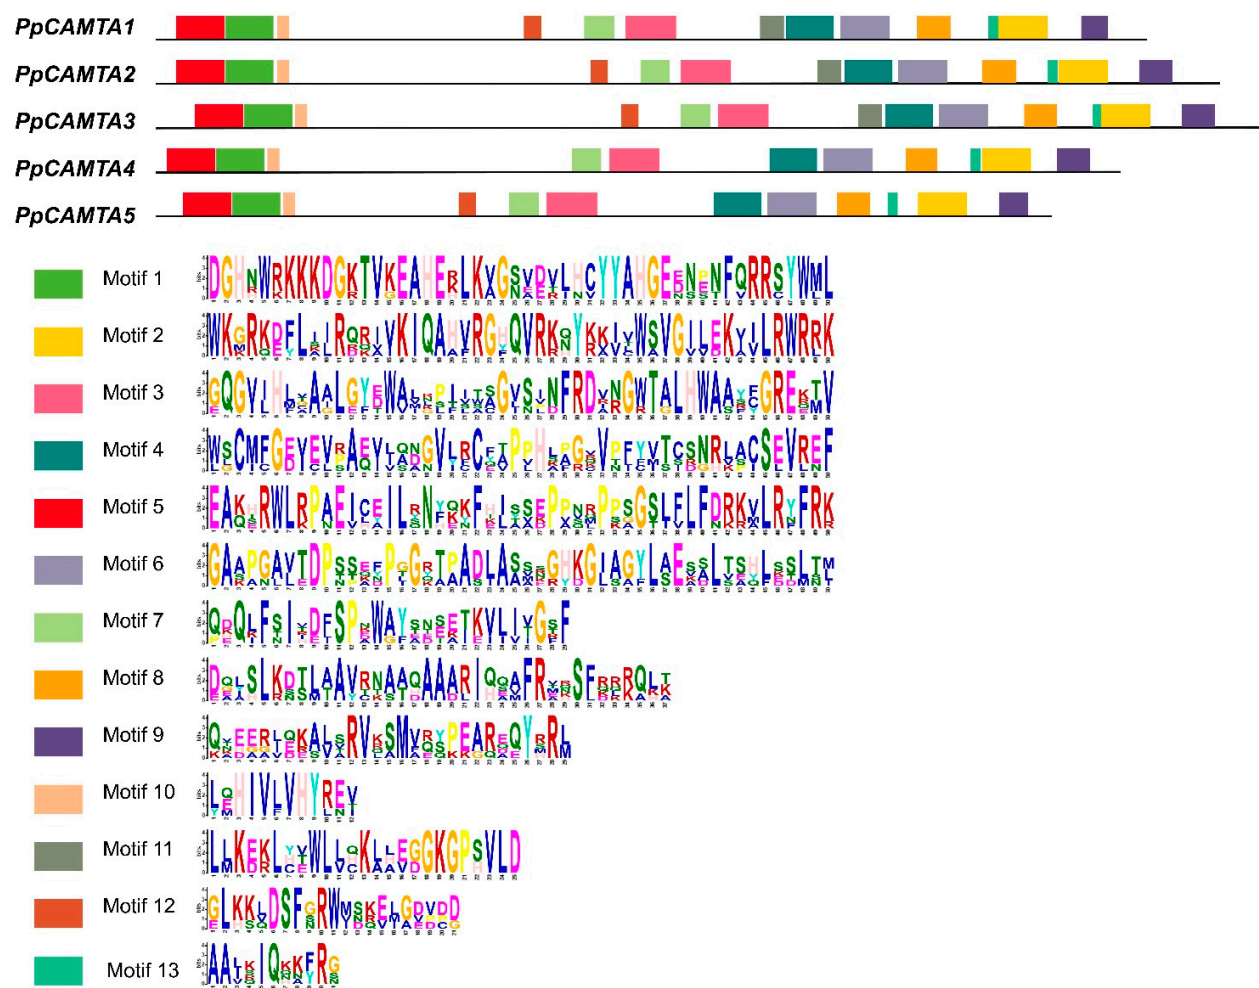

**Figure S2.** Transcript levels of CAMTA genes in response to UV-B and MeJA. (A) UV-B treatment. (B) MeJA treatment. Error bars represent SE (n=3). \*  $P<0.05$ , \*\*  $P<0.01$ , \*\*\*  $P<0.001$ .

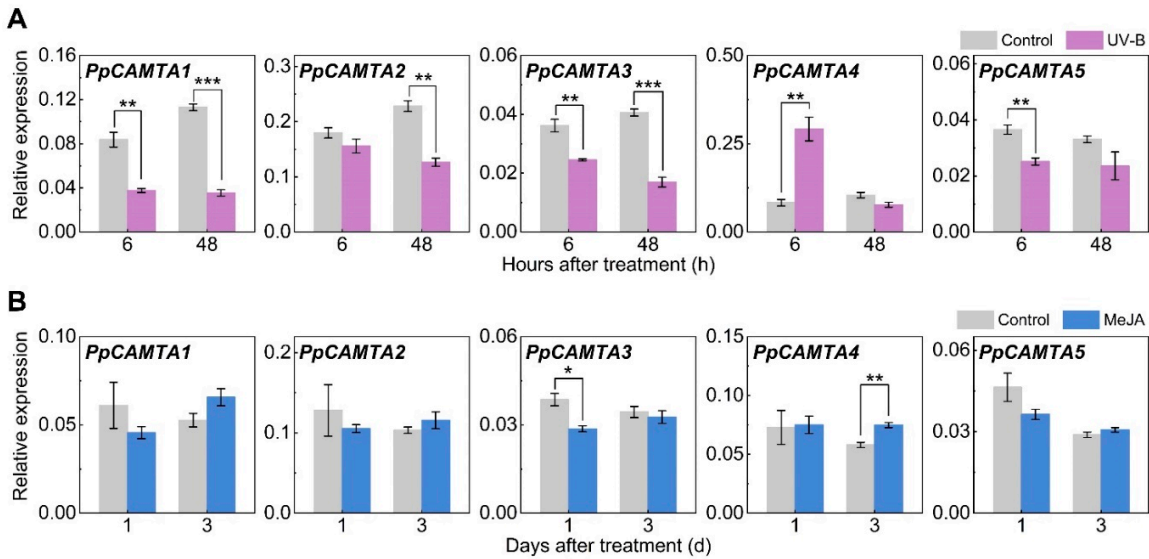

**Figure S3.** Expression levels of *PpCAMTA1*, *PpCAMTA2* and *PpCAMTA3* in OE-*PpCAMTA*s transgenic lines. Error bars indicate SE calculated from three biological replicates. N.D., not detected.

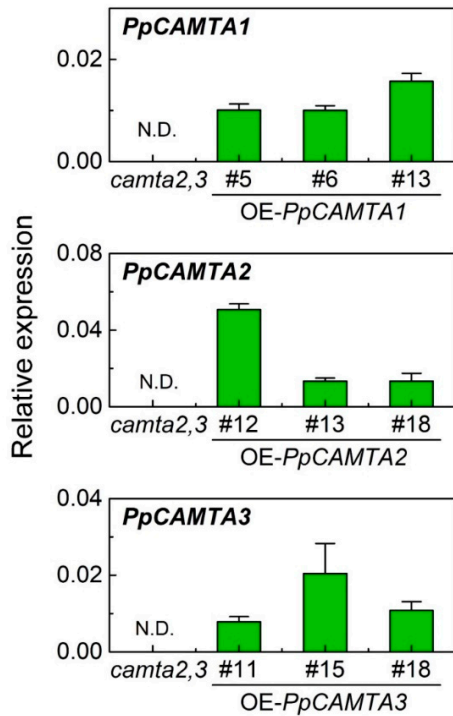

Supplement: s1 [file s1]
